# Supplementary material for: Direct visualization of the drug loading of single DNA origami nanostructures by AFM-IR nanospectroscopy
Source: Royal Society of Chemistry journal article supplement (doi:10.1039/d2nr02701a), 2022-01-01
Supplement: d2nr02701a1.pdf [file d2nr02701a1.pdf]

## Electronic Supplementary Information

# Direct visualization of the drug loading of single DNA origami nanostructures by AFM-IR nanospectroscopy

*Marcel Hanke<sup>a</sup>, Guido Grundmeier<sup>a</sup> and Adrian Keller<sup>\*a</sup>*

<sup>a</sup> Paderborn University, Technical and Macromolecular Chemistry, Warburger Str. 100, 33098 Paderborn, Germany. \*E-mail: [adrian.keller@uni-paderborn.de](mailto:adrian.keller@uni-paderborn.de)

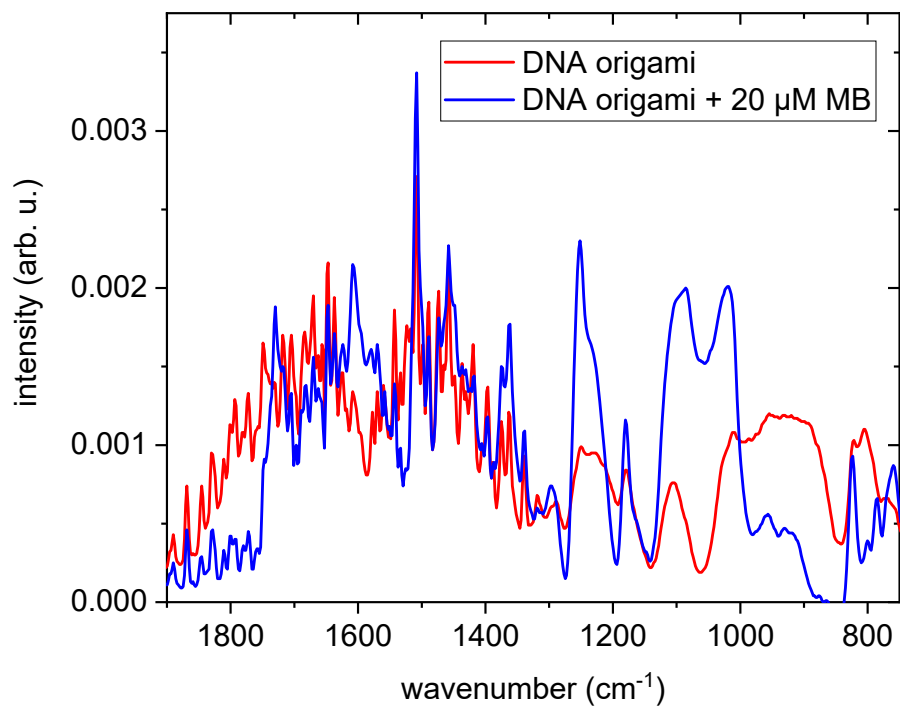

**Figure S1.** IR reflection absorption spectra of the blank (a) and MB-loaded (b) DNA origami samples investigated in Figure 1. The measurements were performed by using a Bruker Vertex 70 spectrometer with a LN-MCT detector. Reflection spectra were recorded at an incident angle of 45° with a spectral resolution of 4 cm<sup>-1</sup> and accumulated over 256 scans. A bare gold substrate was used as a reference.
